# Supplementary material
Source: bioRxiv or medRxiv preprint supplement (https://www.biorxiv.org/highwire/filestream/34567/field_highwire_adjunct_files/0/118349-1.pdf)
Supplement: Supplementary file [file 118349-1.pdf]

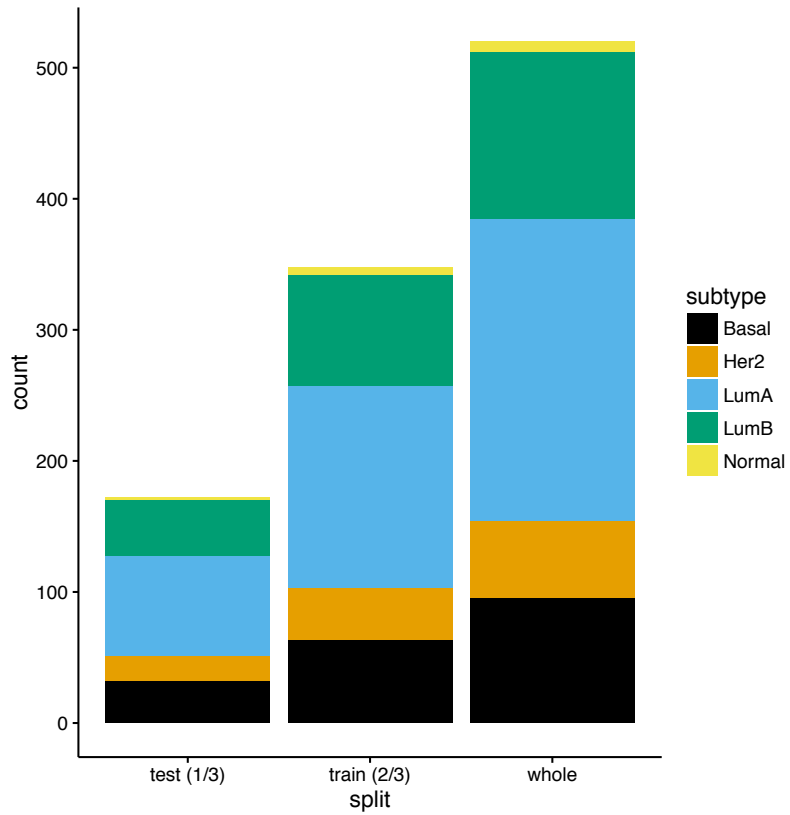

**Figure S1.** Representative distribution of BRCA PAM50 subtypes in training and hold-out sets.

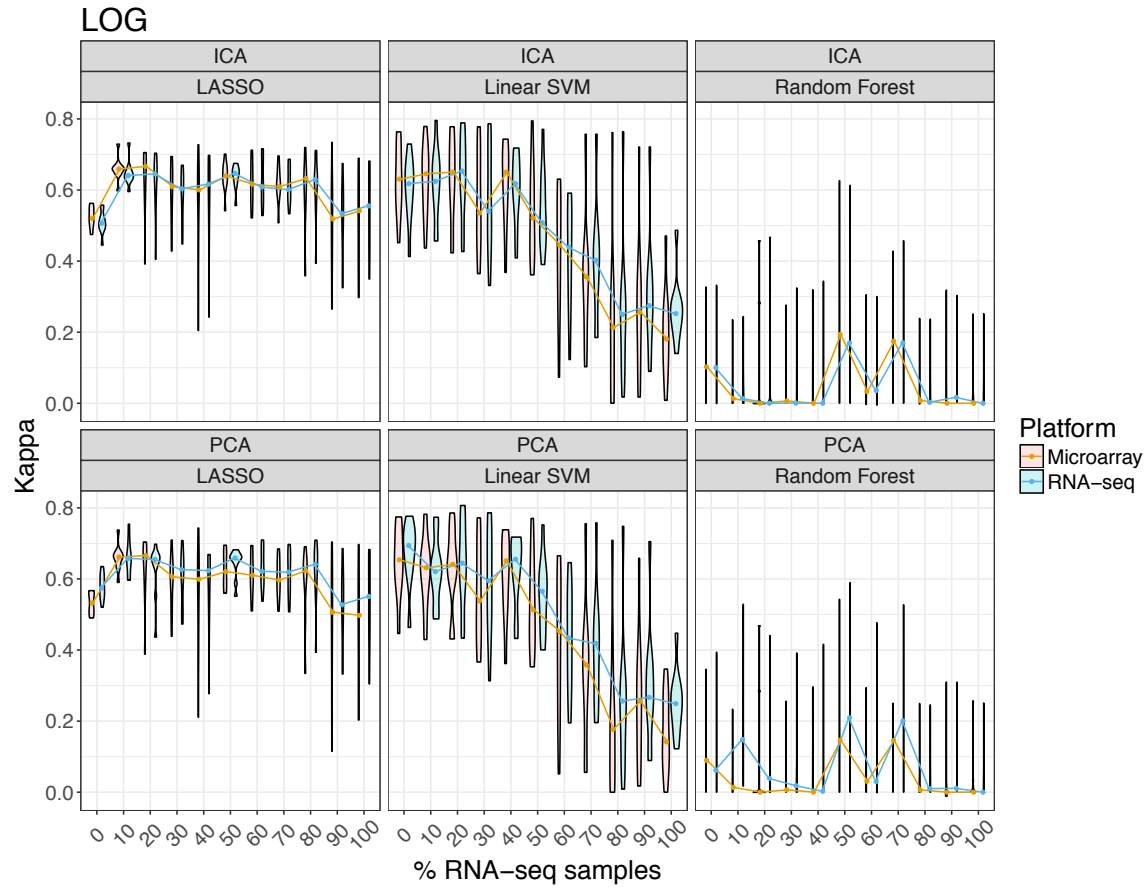

**Figure S2.** Reconstructed Kappa plot for LOG normalization.

**Figure S3.** Mean absolute scaled error (MASE) – reconstruction error. A) LOG B) NPN  
C) QN D) TDM E) Z

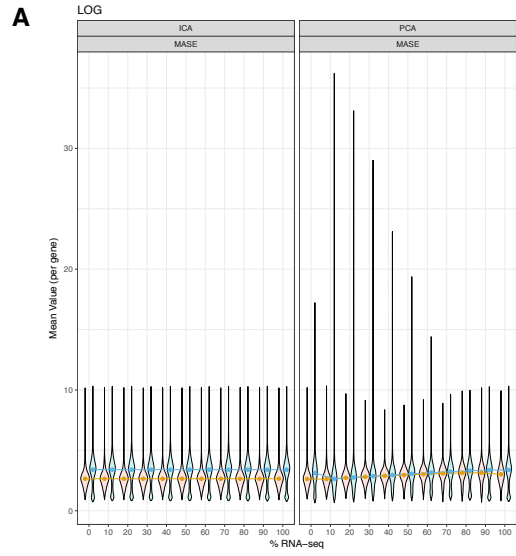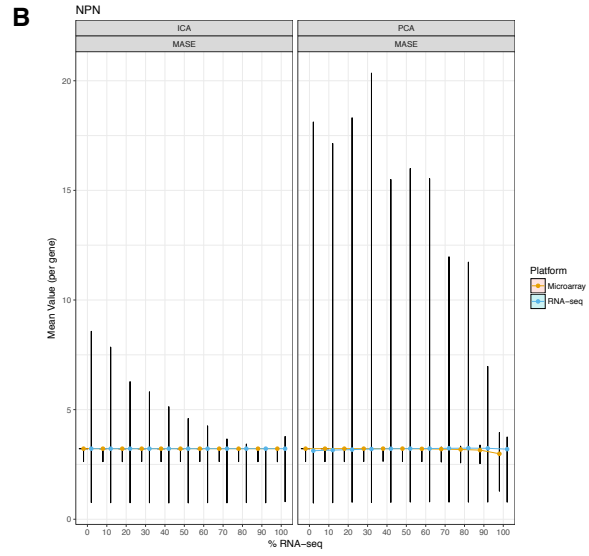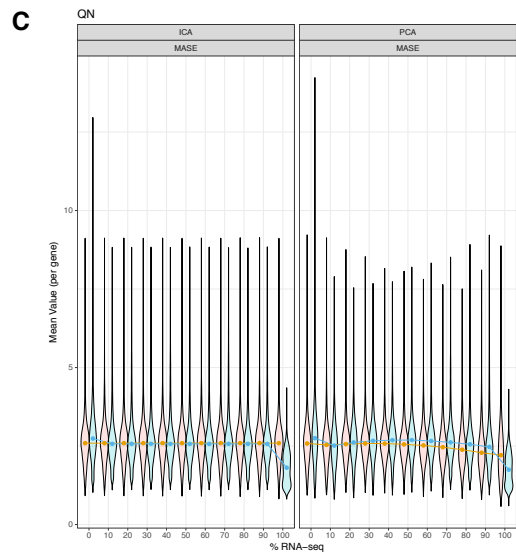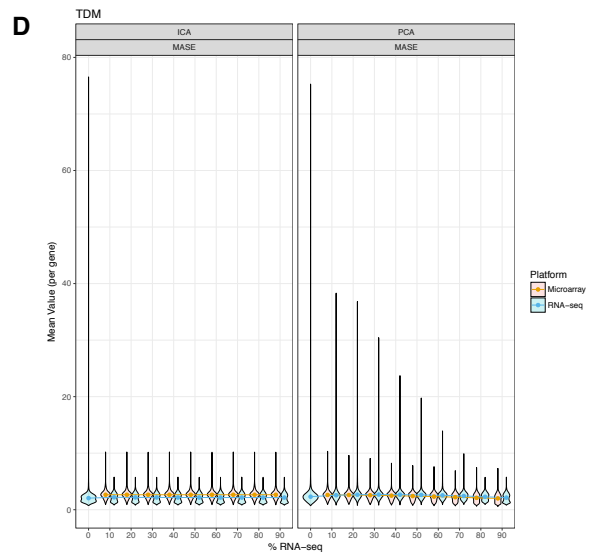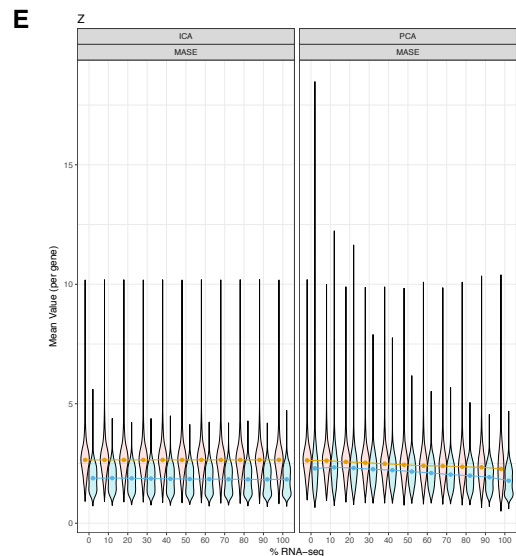

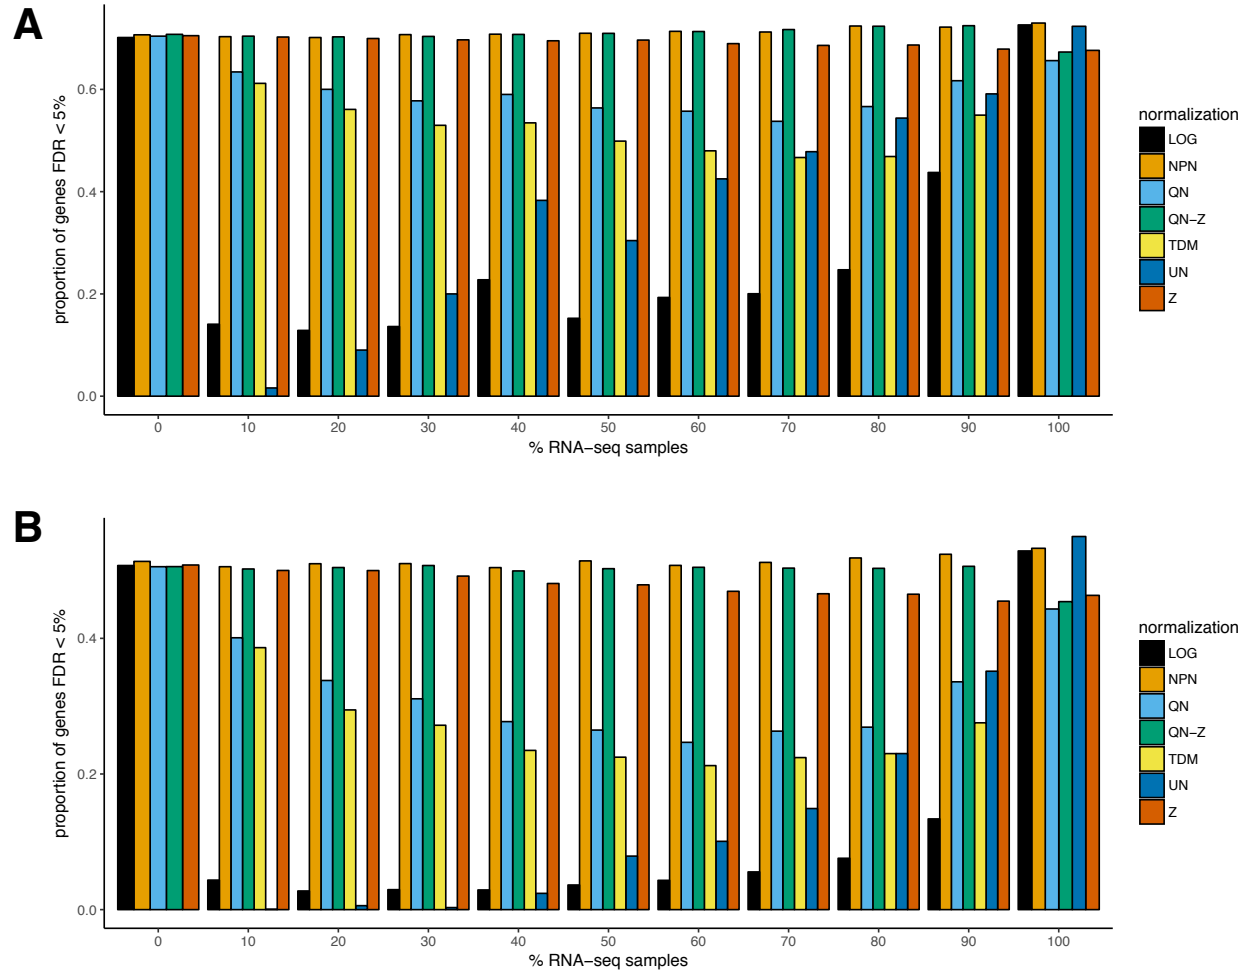

**Figure S4.** Proportion of tested genes that are differentially expressed at FDR < 5%. A) Basal v. Other comparison B) Her2 v. LumA comparison

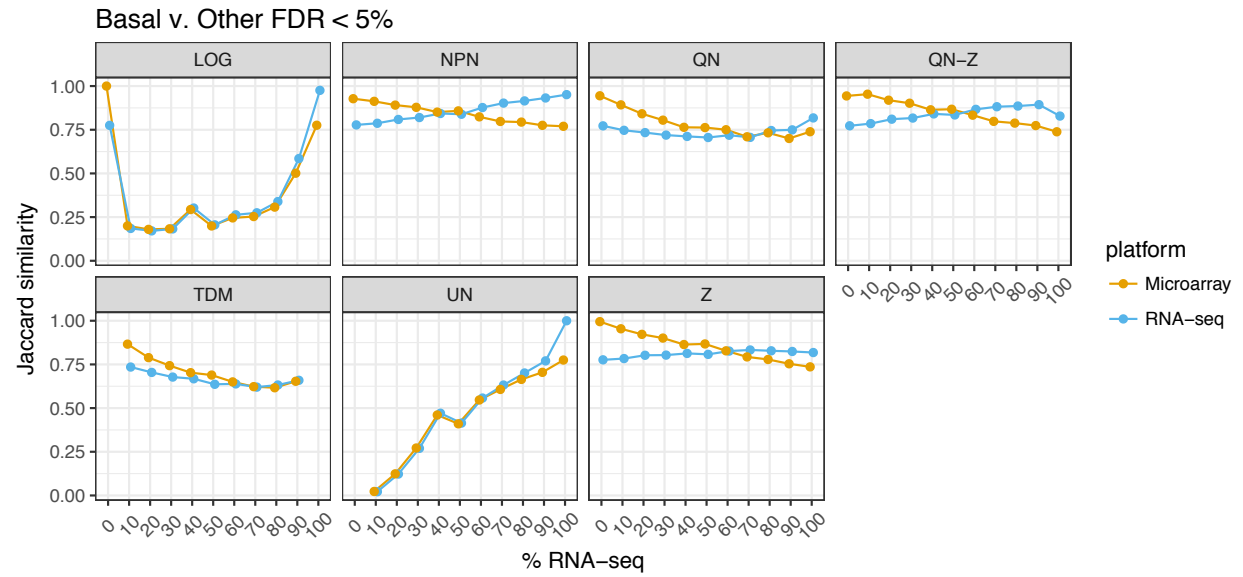

**Figure S5.** Overlap between platform-specific silver standard differentially expressed genes (DEGs) and experimental DEGs. Basal v. all other samples.
